# Supplementary material
Source: PubMed Central journal article supplement (PMC3858960)
Supplement: NIHMS522463-supplement-1_si_001.pdf [file NIHMS522463-supplement-1_si_001.pdf]

## Supplementary Section

### *Derivation of Capillary Filling of Biphasic Plug*

We mathematically derive the condition for capillary filling of the biphasic plug. Capillary filling of the first phase is described by the pressure differences that occurs across the interface using the Young-Laplace equation,

$$\Delta P_1 = \frac{\gamma_1 \cos \theta_1}{R}$$

where,  $\Delta P_1$  is the pressure difference between first phase (aqueous) and the atmosphere,  $\gamma_1$  is the surface tension,  $\theta_1$  is the contact angle between the first phase and glass capillary and R is the radius of the glass capillary.

Using Young-Laplace for phase 2 (oil) capillary filling, we assume that a thin film develops from the first phase but is negligible in height; therefore the radius of curvature of the second phase can be assumed to be a perfect sphere equal to that of the glass capillary ( $\theta = 0$ ).

$$\Delta P_2 = \frac{\gamma_{12}}{R}$$

where  $\Delta P_2$  is the pressure difference between first and second phase,  $\gamma_{12}$  is the interfacial surface tension, and R is the radius of the glass capillary.

For the 2<sup>nd</sup> phase to fill the capillary, the following condition will need to occur where

$$\Delta P_1 > \Delta P_2$$

Substituting Young's equation into left side of the above equation, we derive the following expression,

$$\gamma_{SV} - \gamma_{SL} > \gamma_{12}$$

$\gamma_{SV}$  is the surface tension between first phase and atmosphere and  $\gamma_{SL}$  is the surface tension between first phase and glass capillary. Therefore, capillary filling of the biphasic plug only occurs when the above condition is met.

| First Phase                     | Second Phase  | $\gamma_{12}$<br>(mN/m) | $\gamma_{SV} - \gamma_{SL}$<br>(mN/m) | Experimental<br>Observation<br>(Fill vs. No<br>Fill) |
|---------------------------------|---------------|-------------------------|---------------------------------------|------------------------------------------------------|
| 0 % Triton X-100 in DI Water    | FC 40         | 35.58                   | 28.31                                 | No Fill                                              |
| 0.01 % Triton X-100 in DI Water | FC 40         | 10.55                   | 13.35                                 | Fills Slowly                                         |
| 0.1 % Triton X-100 in DI Water  | FC 40         | 2.78                    | 12.23                                 | Fill                                                 |
| 1 % Triton X-100 in DI Water    | FC 40         | 2.88                    | 11.86                                 | Fill                                                 |
| 0 % Triton X-100 in DI Water    | FC 40 1 % PFO | 7.33                    | 28.31                                 | Fill                                                 |
| 0.01 % Triton X-100 in DI Water | FC 40 1 % PFO | 3.09                    | 13.35                                 | Fill                                                 |
| 0.1 % Triton X-100 in DI Water  | FC 40 1 % PFO | 0.38                    | 12.23                                 | Fill                                                 |
| 1 % Triton X-100 in DI Water    | FC 40 1 % PFO | 0.40                    | 11.86                                 | Fill                                                 |

**Table S1:** With the capillary tube set horizontally, 10  $\mu\text{L}$  of a first phase was pulled into the capillary, followed by 10  $\mu\text{L}$  of a second immiscible phase, as indicated in the table above. The capillary tube was visualized to determine if the immiscible phases were displaced (indicated as pulled vs. no pull). Of the cases tested it was determined that if  $\gamma_{SV} - \gamma_{SL}$  was lower than  $\gamma_{12}$ , no pulling was seen, consistent with the model shown in Figure 2.
